# Supplementary material for: Preparation of asphalt-based microporous organic polymers with sulfur bridges
Source: Royal Society of Chemistry journal article supplement (doi:10.1039/d2py00971d), 2022-01-01
Supplement: d2py00971d1.pdf [file d2py00971d1.pdf]

## Supporting Information

### Preparation of asphalt-based microporous organic polymers with sulfur bridge

*Tuo Di,<sup>a #</sup> Yujie Lei,<sup>a #</sup> Zhaohui Meng,<sup>a</sup> Yunxia Xia,<sup>a</sup> Xingyu Ma,<sup>a</sup> Heng Jiang,<sup>a</sup>  
Tiesheng Li,<sup>b</sup> Tiansheng Zhao<sup>c</sup> and Lei Li<sup>\*a</sup>*

<sup>a</sup> College of Materials, Xiamen University, Xiamen, 361005, P. R. China.

<sup>b</sup> College of Chemistry, Zhengzhou University, Zhengzhou, 450001, P.R. China.

<sup>c</sup> State Key Laboratory of High-efficiency Utilization of Coal and Green Chemical  
Engineering, Ningxia University, 750021, China.

# Tuo Di and Yujie Lei contributed equally to this work.

KEYWORDS: asphalt, sulfur, microporous polymers, supercapacitor

**Table S1. Yield and Surface Area of SBP with different on reaction condition.**

| Reaction Conditions      | yield (%) | S <sub>BET</sub> (m <sup>2</sup> g <sup>-1</sup> ) |
|--------------------------|-----------|----------------------------------------------------|
| 300 °C, 10 h             | 0         | /                                                  |
| 350 °C, 5 h              | 24.75%    | 0                                                  |
| 300 °C, 5 h, 350 °C, 5 h | 87.17%    | 22 m <sup>2</sup> g <sup>-1</sup>                  |

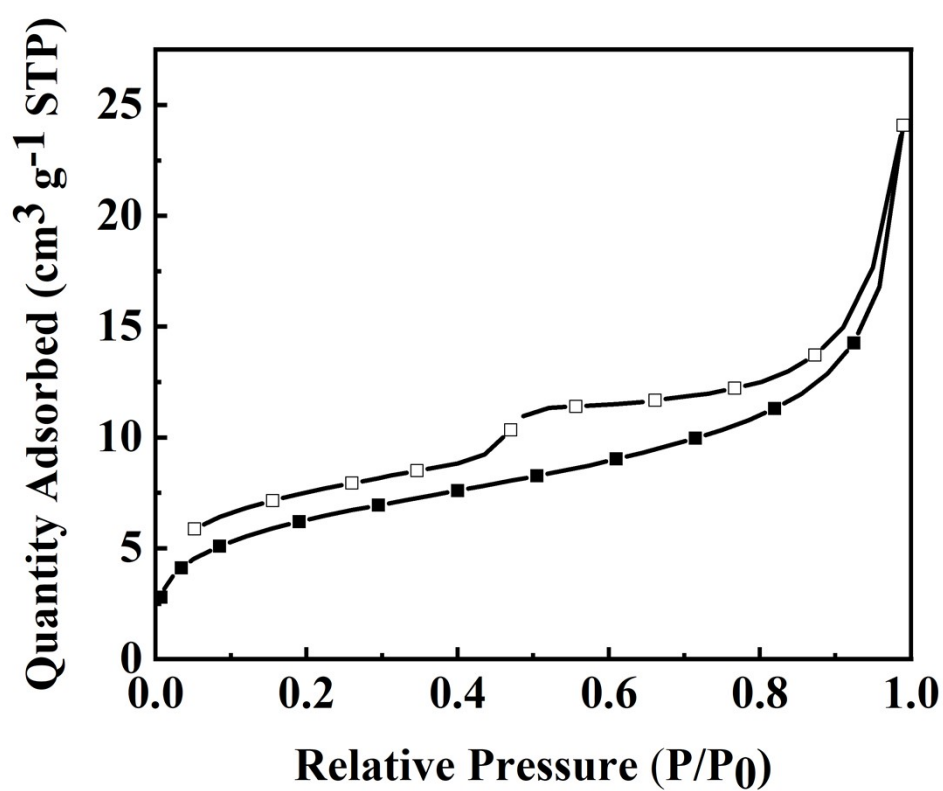

**Figure S1.** N<sub>2</sub> adsorption/desorption isotherm of SBP.

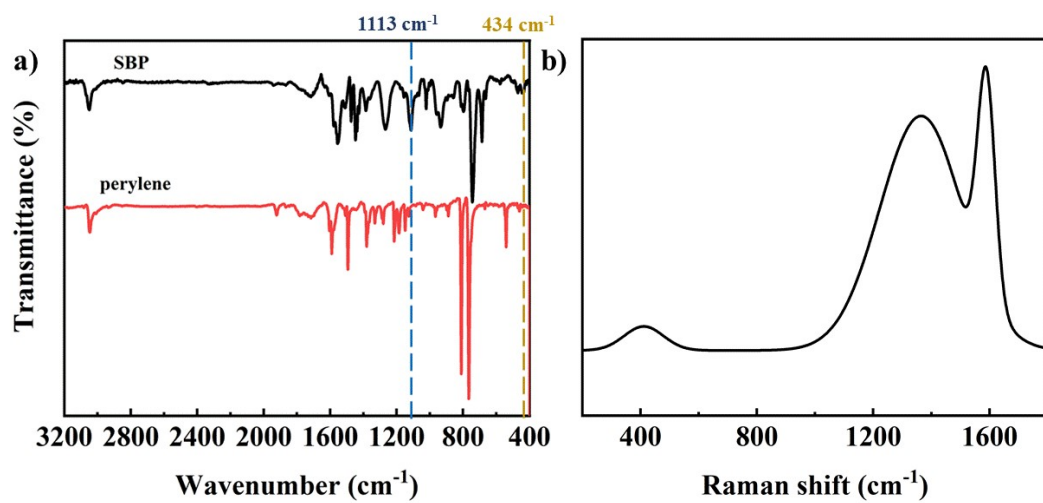

**Figure S2.** (a) FT-IR spectra of perylene and SBP, (b) Raman spectrum of SBP.

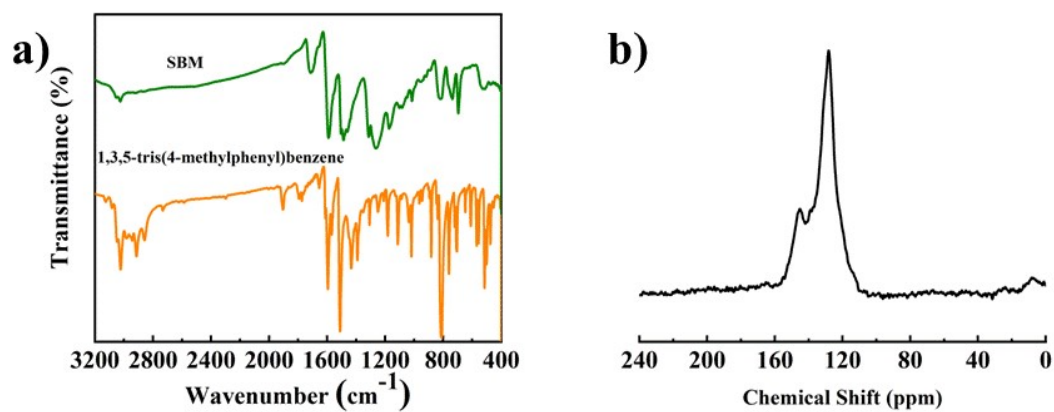

**Figure S3.** (a) FT-IR spectra of 1,3,5-tris(4-methylphenyl)benzene and SBM,

(b)  $^{13}\text{C}$  NMR spectrum of SBM.

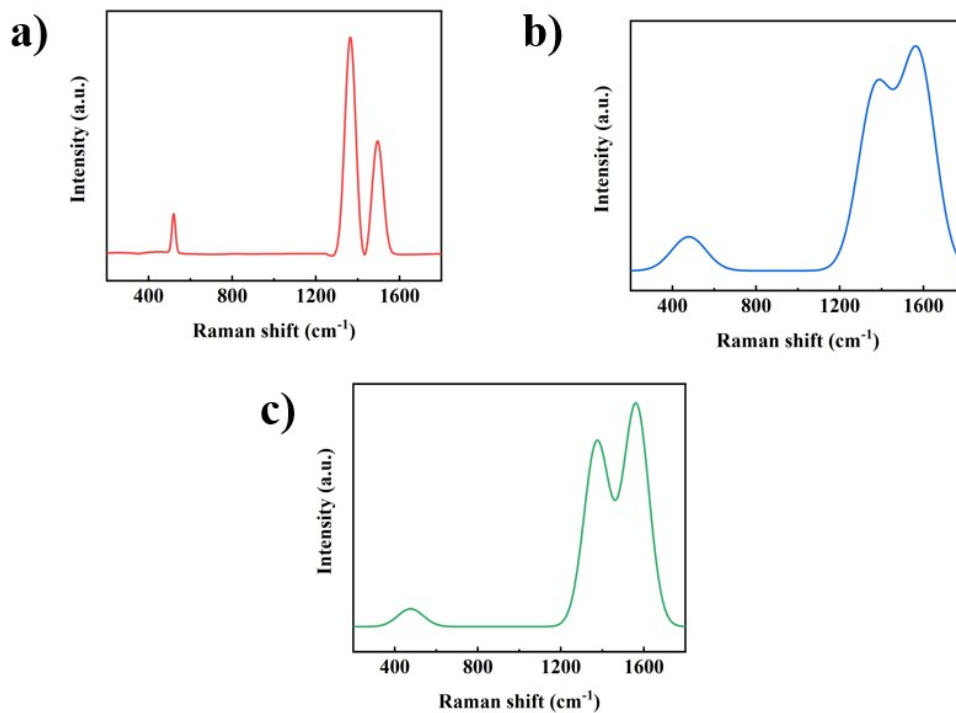

**Figure S4.** (a) Raman spectrum of SBA-82, (b) Raman spectrum of SBA-73, (c) Raman spectrum of SBA-64.

**Table S2. Elemental analyses of SBAs and cSBA-64.**

| Sample    | C/wt% | H/wt% | S/wt% |
|-----------|-------|-------|-------|
| asphalt-1 | 93.73 | 3.68  | 0.78  |
| SBA-91    | 88.27 | 5.18  | 3.68  |
| SBA-82    | 75.08 | 5.80  | 16.31 |
| SBA-73    | 70.95 | 5.45  | 21.02 |
| SBA-64    | 65.33 | 5.25  | 24.36 |
| SBA-55    | 64.94 | 4.86  | 34.89 |
| SBA-46    | 60.39 | 9.31  | 37.01 |
| SBA-37    | 59.43 | 4.25  | 39.84 |
| cSBA-64   | 61.85 | 5.20  | 8.80  |

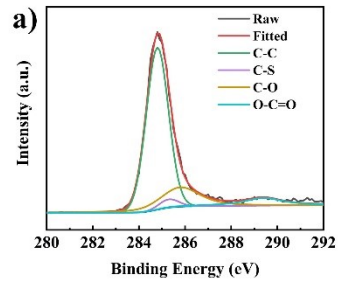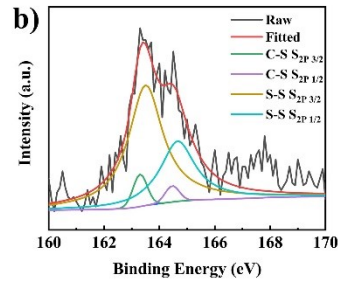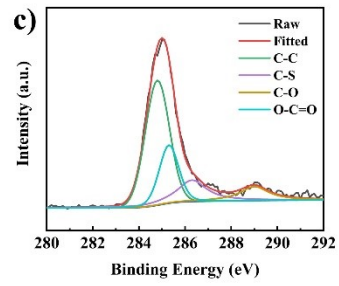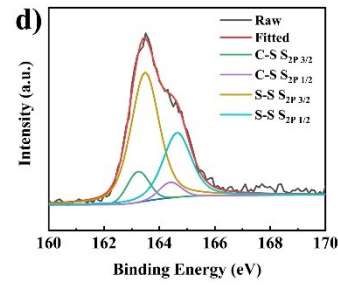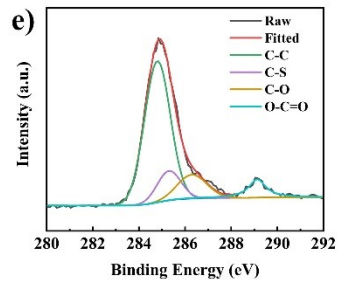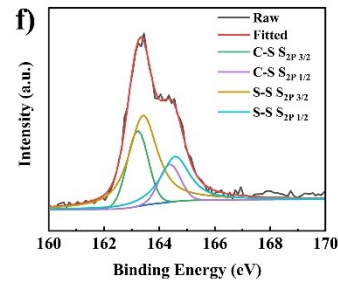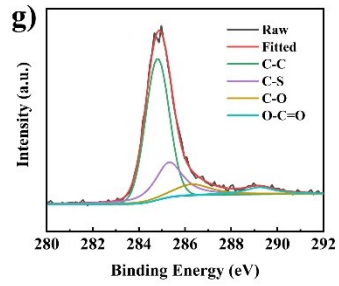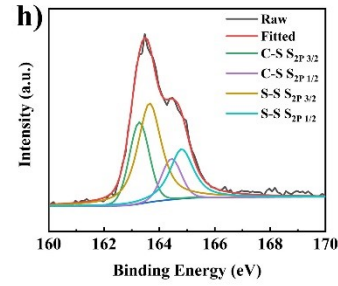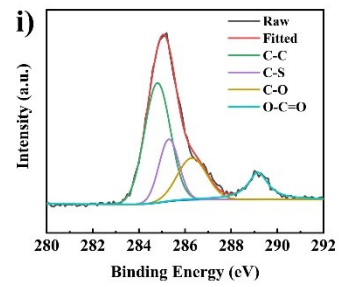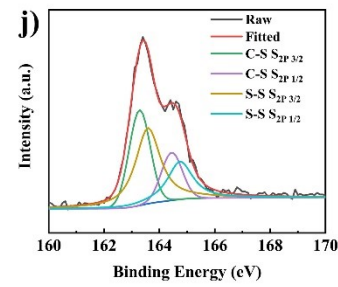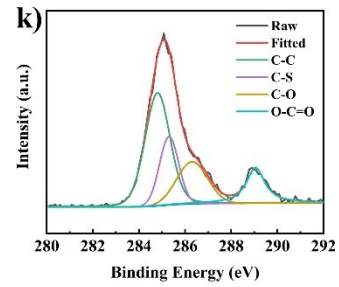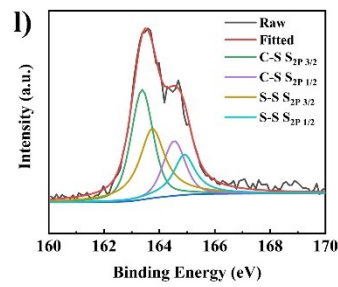

**Figure S5.** (a) C 1s and (b) S 2p XPS spectra of SBA-91; (c) C 1s and (d) S 2p XPS spectra of SBA-82; (e) C 1s and (f) S 2p XPS spectra of SBA-73; (g) C 1s and (h) S 2p XPS spectra of SBA-55; (i) C 1s and (j) S 2p XPS spectra of SBA-46; (k) C 1s and (l) S 2p XPS spectra of SBA-37.

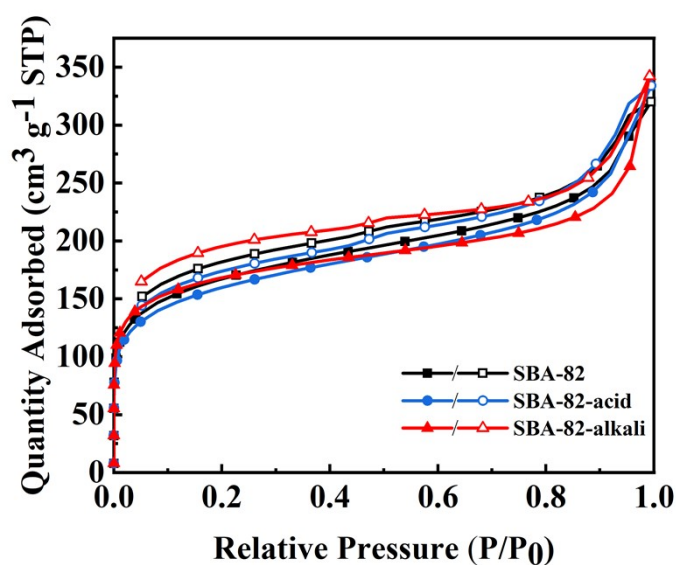

**Figure S6.** Nitrogen adsorption-desorption isotherms for SBA-82 before and after being soaked and stirred in 1 M HCl (blue) and 1 M NaOH (red) for 24 h, respectively.

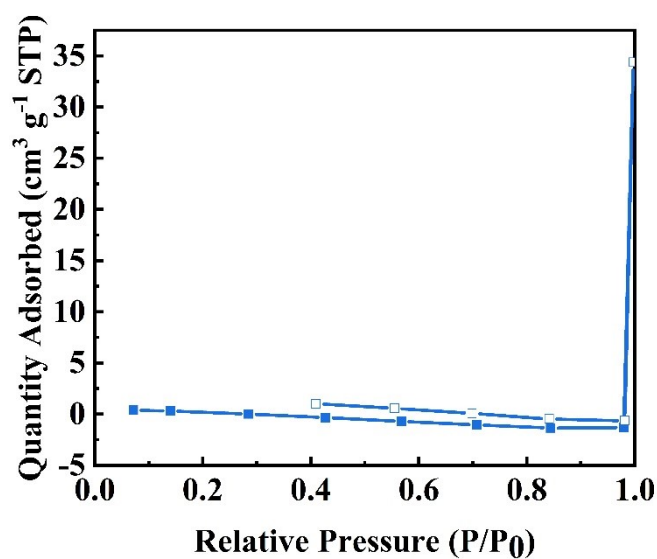

**Figure S7.** N<sub>2</sub> adsorption/desorption isotherm of SBA-82-WS.

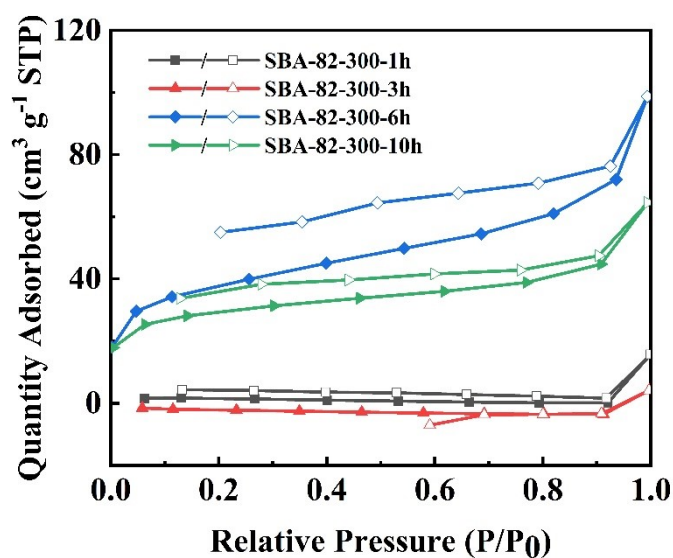

**Figure S8.** N<sub>2</sub> adsorption/desorption isotherms of SBA-xy-z-t (x and y stand for the mass feeding ratio of asphalt-1 and sulfur, respectively; z denotes reaction temperature and t represents reaction time). With the increasing of reaction time, the surface area of corresponding product is 0, 0, 134 and 103 m<sup>2</sup> g<sup>-1</sup>.

**Table S3. Components with different molecular weight in asphalt samples.**

| Sample    | Relative molecular weight | percentage(%) |
|-----------|---------------------------|---------------|
| Asphalt-1 | 274                       | 61            |
|           | 453                       | 12            |
|           | 963                       | 21            |
| MQ215     | 161                       | 5             |
|           | 193                       | 67            |
|           | 566                       | 16            |
| MQ250     | 274                       | 11            |
|           | 679                       | 58            |
|           | 963                       | 14            |
| MQ270     | 274                       | 21            |
|           | 566                       | 15            |
|           | 679                       | 38            |
|           | 792                       | 12            |

**Table S4. BET surface areas of different feeding ratio of asphalts and sulfur.**

| Sample  | $S_{\text{BET}}^a$ ( $\text{m}^2 \text{g}^{-1}$ ) |      |      |
|---------|---------------------------------------------------|------|------|
|         | 8: 2                                              | 7: 3 | 6: 4 |
| SBMQ215 | 598                                               | 517  | 396  |
| SBMQ250 | 324                                               | 284  | 195  |
| SBMQ270 | 152                                               | 134  | 76   |

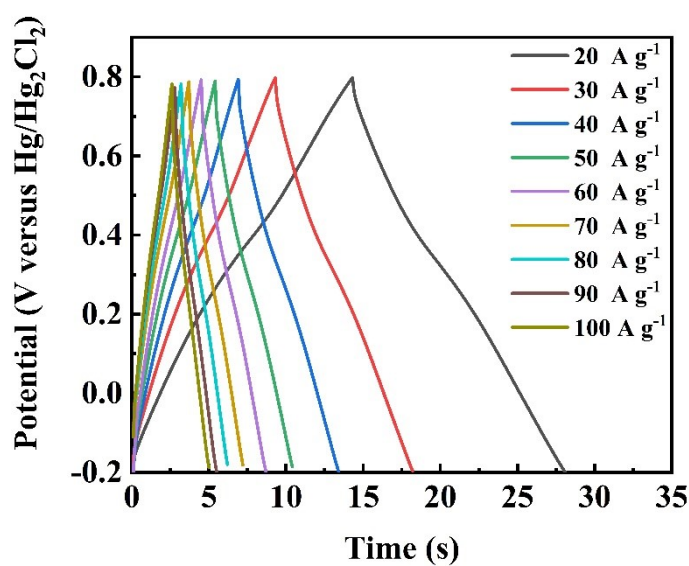**Figure S9.** GCD curves of three-electrode system at high current density.



**Table S5. Comparison of specific capacitance of cSBA-64 and other sulfur-doped carbon materials.**

| carbon materials | S <sub>BET</sub> (m <sup>2</sup> g <sup>-1</sup> ) | sulfur content (wt%) | specific capacitance (F g <sup>-1</sup> ) | current density (A g <sup>-1</sup> ) | Ref.      |
|------------------|----------------------------------------------------|----------------------|-------------------------------------------|--------------------------------------|-----------|
| NS-GA-5          | 242.5                                              | 1.28                 | 203.2                                     | 1                                    | 40        |
| DHGH-12          | 251                                                | 2.43                 | 252                                       | 0.5                                  | 41        |
| SP-AG            | 409                                                | <13.2                | 208                                       | 1                                    | 42        |
| cSBA-64          | 1756                                               | 8.80                 | 372                                       | 0.5                                  | this work |
